# Supplementary material for: Life after Burn, Part II: Substance Abuse, Relationship and Living Situation of Burn Survivors
Source: MDPI journal article supplement (doi:10.3390/medicina58050563), 2022-04-19
Supplement: s1 [file s1]

Table S1. Questionnaire.

| <b>Have you been in a relationship before your burn injury?</b> | <b>Are you in a relationship at present?</b>      |
|-----------------------------------------------------------------|---------------------------------------------------|
| a. yes, married                                                 | a. yes, married                                   |
| b. yes, not married                                             | b. yes, not married                               |
| c. no, single                                                   | c. no, single                                     |
| d. no, divorced                                                 | d. no, divorced                                   |
| <b>How did you live before your burn injury?</b>                | <b>How do you live at present?</b>                |
| a. owned apartment/house                                        | a. owned apartment/house                          |
| b. rented apartment/house                                       | b. rented apartment/house                         |
| c. assisted living                                              | c. assisted living                                |
| d. care facility                                                | d. care facility                                  |
| <b>How often did you drink alcohol before your burn injury?</b> | <b>How often do you drink alcohol at present?</b> |
| a. never                                                        | a. never                                          |
| b. once a month                                                 | b. once a month                                   |
| c. 2-4 times a month                                            | c. 2-4 times a month                              |
| d. 2-3 times a week                                             | d. 2-3 times a week                               |
| e. 4 times or more a week                                       | e. 4 times or more a week                         |
| <b>Did you smoke before your burn injury?</b>                   | <b>Do you smoke at present?</b>                   |
| a. yes (more than one pack a week)                              | a. yes (more than one pack a week)                |
| b. occasionally (less than one pack a week)                     | b. occasionally (less than one pack a week)       |
| c. never                                                        | c. never                                          |
| <b>Did you consume drugs before your burn injury?</b>           | <b>Do you take drugs regularly at present?</b>    |
| a. yes                                                          | a. yes                                            |
| b. no                                                           | b. no                                             |
